# Supplementary material
Source: PubMed Central journal article supplement (PMC3053571)
Supplement: NIHMS269267-supplement-3.pdf [file NIHMS269267-supplement-3.pdf]

**Supplementary Table 1. Genetic characteristics of founder variant(s).**

| Pub-id                | WG | HG <sup>1</sup> | WG      |                    | <i>env</i> diversity <sup>3</sup> |        |        |        | Treatment |
|-----------------------|----|-----------------|---------|--------------------|-----------------------------------|--------|--------|--------|-----------|
|                       |    |                 | InSites | Cons. <sup>2</sup> | n                                 | Mean   | Min.   | Max.   |           |
| 502-0006              | 0  | 1               | n.a.    | 1                  | 0                                 | n.a.   | n.a.   | n.a.   | Placebo   |
| 502-0053              | 10 |                 | 0       | 1                  | 10                                | 0.001  | 0      | 0.0041 | Placebo   |
| 502-0062              | 6  |                 | 2       | 1                  | 6                                 | 0.0008 | 0      | 0.0015 | Vaccine   |
| 502-0176              | 11 | 1               | 13      | 1                  | 11                                | 0.0022 | 0      | 0.0044 | Placebo   |
| 502-0223              | 1  |                 | n.a.    | 1                  | 1                                 | n.a.   | n.a.   | n.a.   | Placebo   |
| 502-0227              | 11 |                 | 397     | 2                  | 11                                | 0.0314 | 0      | 0.058  | Vaccine   |
| 502-0287              | 4  | 1               | 1       | 1                  | 4                                 | 0.0011 | 0.0007 | 0.0015 | Vaccine   |
| 502-0309 <sup>a</sup> | 5  |                 | 0       | 1                  | 5                                 | 0      | 0      | 0      | Vaccine   |
| 502-0322              | 3  | 2               | 0       | 1                  | 5                                 | 0.0006 | 0      | 0.0015 | Placebo   |
| 502-0341              | 7  |                 | 2       | 1                  | 7                                 | 0.0008 | 0      | 0.0015 | Vaccine   |
| 502-0346              | 9  |                 | 3       | 1                  | 9                                 | 0.0008 | 0      | 0.0029 | Placebo   |
| 502-0364              | 5  |                 | 0       | 1                  | 5                                 | 0.0003 | 0      | 0.0007 | Placebo   |
| 502-0388              | 5  | 4               | 1       | 1                  | 9                                 | 0.0005 | 0      | 0.0022 | Placebo   |
| 502-0491              | 4  |                 | 2       | 1                  | 4                                 | 0.0027 | 0      | 0.0051 | Vaccine   |
| 502-0524              | 10 |                 | 5       | 1                  | 10                                | 0.0007 | 0      | 0.0022 | Vaccine   |
| 502-0525              | 5  |                 | 1       | 1                  | 5                                 | 0.0003 | 0      | 0.0007 | Placebo   |
| 502-0572              | 5  |                 | 0       | 1                  | 5                                 | 0.0003 | 0      | 0.0007 | Placebo   |
| 502-0648              | 4  |                 | 1       | 1                  | 4                                 | 0.0004 | 0      | 0.0007 | Vaccine   |
| 502-0717              | 6  |                 | 0       | 1                  | 6                                 | 0.0002 | 0      | 0.0007 | Placebo   |
| 502-0762              | 10 |                 | 2       | 1                  | 9                                 | 0.0006 | 0      | 0.0022 | Vaccine   |
| 502-0823              | 7  |                 | 1       | 1                  | 7                                 | 0.0002 | 0      | 0.0007 | Vaccine   |
| 502-0839              | 12 |                 | 103     | 2                  | 12                                | 0.0127 | 0      | 0.0226 | Vaccine   |
| 502-0841              | 4  |                 | 4       | 1                  | 4                                 | 0.0029 | 0.0022 | 0.0037 | Vaccine   |
| 502-0879 <sup>a</sup> | 5  |                 | 13      | 2                  | 5                                 | 0.0003 | 0      | 0.0007 | Vaccine   |
| 502-0897              | 10 |                 | 10      | 1                  | 10                                | 0.0016 | 0      | 0.0044 | Vaccine   |
| 502-0923              | 8  |                 | 0       | 1                  | 8                                 | 0.0002 | 0      | 0.0009 | Placebo   |
| 502-0938              | 4  | 6               | 9       | 1                  | 10                                | 0.0019 | 0      | 0.0066 | Placebo   |
| 502-0961              | 11 | 1               | 3       | 2                  | 12                                | 0.0005 | 0      | 0.0022 | Vaccine   |
| 502-0965              | 2  | 2               | 59      | 2                  | 4                                 | 0.0141 | 0      | 0.0261 | Placebo   |
| 502-1027              | 10 |                 | 23      | 2                  | 10                                | 0.0026 | 0      | 0.0044 | Placebo   |
| 502-1046              | 5  |                 | 0       | 1                  | 5                                 | 0.0003 | 0      | 0.0007 | Vaccine   |
| 502-1047              | 5  |                 | 4       | 1                  | 5                                 | 0.0006 | 0      | 0.0015 | Placebo   |
| 502-1055              | 2  | 4               | 0       | 1                  | 6                                 | 0.0002 | 0      | 0.0007 | Vaccine   |
| 502-1115 <sup>b</sup> | 4  |                 | 4       | 1                  | 4                                 | 0.0028 | 0.0015 | 0.0037 | Placebo   |
| 502-1174              | 10 |                 | 114     | 2                  | 10                                | 0.0011 | 0      | 0.0029 | Vaccine   |
| 502-1191              | 5  |                 | 4       | 1                  | 5                                 | 0.0037 | 0.0029 | 0.0051 | Vaccine   |
| 502-1211              | 5  |                 | 0       | 1                  | 5                                 | 0.0003 | 0      | 0.0007 | Vaccine   |
| 502-1368              | 2  | 1               | 0       | 1                  | 2                                 | 0.0015 | 0.0015 | 0.0015 | Vaccine   |
| 502-1399              | 5  |                 | 40      | 2                  | 5                                 | 0.0051 | 0.0015 | 0.0095 | Vaccine   |
| 502-1400              | 5  |                 | 0       | 1                  | 5                                 | 0.0006 | 0      | 0.0015 | Vaccine   |
| 502-1478              | 5  |                 | 0       | 1                  | 5                                 | 0      | 0      | 0      | Placebo   |
| 502-1500              | 3  | 1               | 2       | 1                  | 4                                 | 0.0018 | 0.0007 | 0.0029 | Vaccine   |
| 502-1504 <sup>d</sup> | 9  |                 | 55      | 2                  | 8                                 | 0.0067 | 0      | 0.026  | Placebo   |
| 502-1512              | 11 |                 | 24      | 1                  | 11                                | 0.0022 | 0      | 0.0051 | Vaccine   |
| 502-1518              | 10 |                 | 29      | 2                  | 10                                | 0.0018 | 0      | 0.0044 | Placebo   |
| 502-1619              | 10 |                 | 45      | 2                  | 10                                | 0.0036 | 0      | 0.0103 | Vaccine   |
| 502-1709              | 5  |                 | 74      | 2                  | 11                                | 0.0154 | 0.0007 | 0.0543 | Vaccine   |
| 502-1799              | 5  |                 | 2       | 1                  | 5                                 | 0.0004 | 0      | 0.0007 | Placebo   |
| 502-1897              | 5  |                 | 0       | 1                  | 5                                 | 0      | 0      | 0      | Vaccine   |
| 502-1919              | 0  | 1               | n.a.    | 1                  | 1                                 | n.a.   | n.a.   | n.a.   | Placebo   |
| 502-1926              | 8  | 1               | 2       | 1                  | 8                                 | 0.0018 | 0      | 0.0066 | Vaccine   |
| 502-2000              | 9  | 1               | 20      | 1                  | 10                                | 0.0036 | 0.0007 | 0.0059 | Vaccine   |
| 502-2008              | 10 |                 | 98      | 2                  | 10                                | 0.0104 | 0.0029 | 0.0192 | Placebo   |
| 502-2136              | 5  |                 | 0       | 1                  | 5                                 | 0.0009 | 0      | 0.0022 | Vaccine   |
| 502-2241              | 11 |                 | 18      | 1                  | 11                                | 0.0022 | 0      | 0.0051 | Vaccine   |
| 502-2254              | 6  |                 | 2       | 1                  | 6                                 | 0.0033 | 0.0015 | 0.0051 | Vaccine   |
| 502-2289              | 5  |                 | 4       | 1                  | 5                                 | 0.0028 | 0      | 0.0051 | Vaccine   |
| 502-2305              | 11 | 3               | 127     | 4                  | 14                                | 0.0047 | 0      | 0.0088 | Vaccine   |
| 502-2349              | 4  |                 | 1       | 1                  | 4                                 | 0.0019 | 0      | 0.0037 | Vaccine   |
| 502-2437              | 10 | 2               | 0       | 1                  | 10                                | 0.0001 | 0      | 0.0007 | Vaccine   |
| 502-2495              | 3  |                 | 0       | 1                  | 3                                 | 0      | 0      | 0      | Placebo   |
| 502-2586              | 6  | 2               | 15      | 2                  | 6                                 | 0.0045 | 0.0015 | 0.0074 | Placebo   |
| 502-2622              | 5  |                 | 16      | 1                  | 5                                 | 0.0032 | 0.0015 | 0.0044 | Placebo   |
| 502-2649              | 9  |                 | 36      | 2                  | 9                                 | 0.0015 | 0      | 0.0037 | Vaccine   |
| 502-2667              | 5  |                 | 0       | 1                  | 5                                 | 0.0006 | 0      | 0.0015 | Placebo   |
| 502-2696 <sup>c</sup> | 6  | 1               | 0       | 1                  | 6                                 | 0.001  | 0      | 0.0029 | Vaccine   |
| 502-2717              | 6  | 1               | 1       | 1                  | 7                                 | 0.0012 | 0      | 0.0029 | Vaccine   |
| 502-2794              | 5  |                 | 0       | 1                  | 5                                 | 0.0012 | 0      | 0.0029 | Placebo   |

- 1 Number of additional half-genome sequences.
- 2 Number of consensus founder variant(s).
- 3 Nucleotide pairwise sequence diversity (Mean and minimum and maximum).
- a Possible transmission linkage with another volunteer.
- b Female volunteer.
- c Recombinant CRF02\_AG isolate.
- d No HLA- genotype data available.
