# Supplementary material
Source: PubMed Central journal article supplement (PMC3053571)
Supplement: NIHMS269267-supplement-4.pdf [file NIHMS269267-supplement-4.pdf]

**Supplementary Table 2. Signature analysis of K-mers (K=8, 9, 10, or 11) that are known or possible (EpiPred posterior probability > 0.0) in the MRKAd5 insert sequence.**

**Gag 8-mers**

| Position1 | Estimate | p-value | q-value |
|-----------|----------|---------|---------|
| 389       | 7.87     | 0.0043  | 0.19    |
| 372       | -11.83   | 0.0035  | 0.17    |
| 204       | -4.43    | 0.0035  | 0.17    |
| 401       | 13.27    | 0.0034  | 0.17    |
| 400       | 13.27    | 0.0034  | 0.17    |
| 399       | 12.73    | 0.0032  | 0.17    |
| 83        | -11.19   | 0.0027  | 0.17    |
| 402       | 11.43    | 0.0017  | 0.17    |
| 403       | 12.72    | 0.0013  | 0.17    |
| 383       | 15.00    | 0.0009  | 0.17    |

**Pol 8-mers: None evaluable**

**Nef 8-mers**

| Position1 | Estimate | p-value | q-value |
|-----------|----------|---------|---------|
| 20        | -14.73   | 0.0028  | 0.12    |
| 122       | -3.69    | 0.0027  | 0.12    |
| 125       | -3.76    | 0.0022  | 0.12    |
| 124       | -3.76    | 0.0022  | 0.12    |
| 123       | -3.76    | 0.0022  | 0.12    |

**Gag 9-mers**

| Position1 | Estimate | p-value | q-value |
|-----------|----------|---------|---------|
| 372       | -14.15   | 0.0041  | 0.18    |
| 204       | -4.43    | 0.0035  | 0.17    |
| 401       | 13.27    | 0.0034  | 0.17    |
| 400       | 13.27    | 0.0034  | 0.17    |
| 399       | 13.27    | 0.0034  | 0.17    |
| 398       | 12.16    | 0.0028  | 0.17    |
| 383       | 14.52    | 0.0028  | 0.17    |
| 382       | 15.48    | 0.0017  | 0.17    |
| 402       | 12.72    | 0.0013  | 0.17    |
| 403       | 18.78    | 0.00034 | 0.15    |

**Pol 9-mers: None evaluable**

**Nef 9-mers**

| Position1 | Estimate | p-value | q-value |
|-----------|----------|---------|---------|
| 122       | -3.69    | 0.0027  | 0.14    |
| 121       | -3.69    | 0.0027  | 0.14    |
| 124       | -3.76    | 0.0022  | 0.14    |
| 123       | -3.76    | 0.0022  | 0.14    |

**Gag 10-mers**

| Position1 | Estimate | p-value | q-value |
|-----------|----------|---------|---------|
| 403       | 18.78    | 0.00034 | 0.08    |
| 402       | 18.78    | 0.00034 | 0.08    |

**Pol 10-mers: None evaluable****Nef 10-mers:**

| Position1 | Estimate | p-value | q-value |
|-----------|----------|---------|---------|
| 122       | -3.69    | 0.0027  | 0.19    |
| 121       | -3.69    | 0.0027  | 0.19    |
| 123       | -3.76    | 0.0022  | 0.19    |

**Gag 11-mers**

| Position1 | Estimate | p-value | q-value |
|-----------|----------|---------|---------|
| 401       | 20.64    | 0.00053 | 0.08    |
| 403       | 18.78    | 0.00034 | 0.08    |
| 402       | 18.78    | 0.00034 | 0.08    |

**Pol 11-mers: None evaluable****Nef 11-mers: None evaluable**
