# Supplementary material
Source: PubMed Central journal article supplement (PMC3053571)
Supplement: NIHMS269267-supplement-6.pdf [file NIHMS269267-supplement-6.pdf]

Supplementary Fig. 2

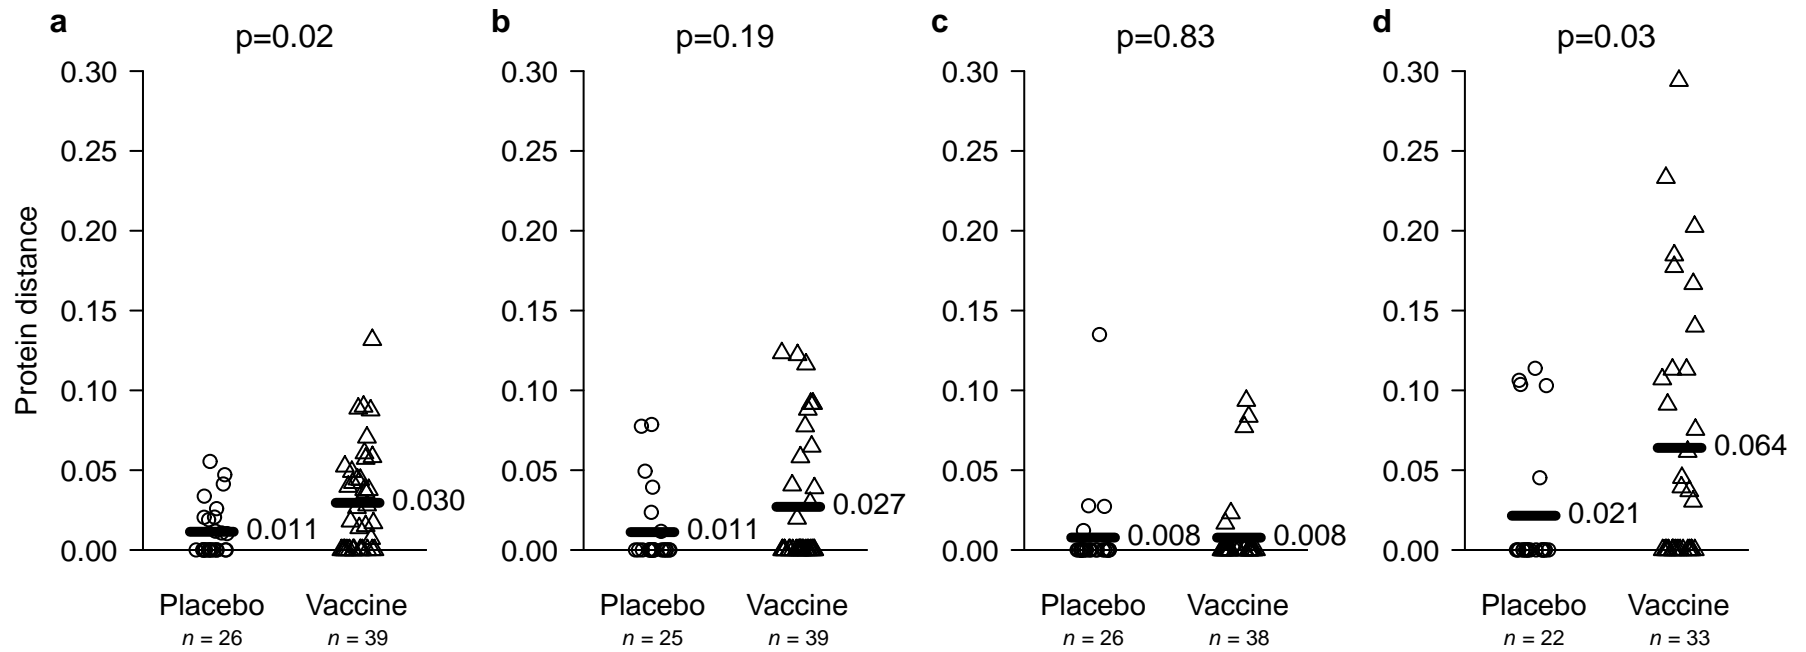

**Supplementary Fig. 2. Epitope-specific protein distances between epitopes from founder sequences and the MRKAd5 insert sequence (Epipred).** Comparison of epitopic distances across treatment assignment based on NetMHC predictions using Gag, Pol and Nef epitopes combined (a), or separately (b-d).
