# Supplementary material
Source: PubMed Central journal article supplement (PMC3053571)
Supplement: NIHMS269267-supplement-7.pdf [file NIHMS269267-supplement-7.pdf]

Supplementary Fig. 3

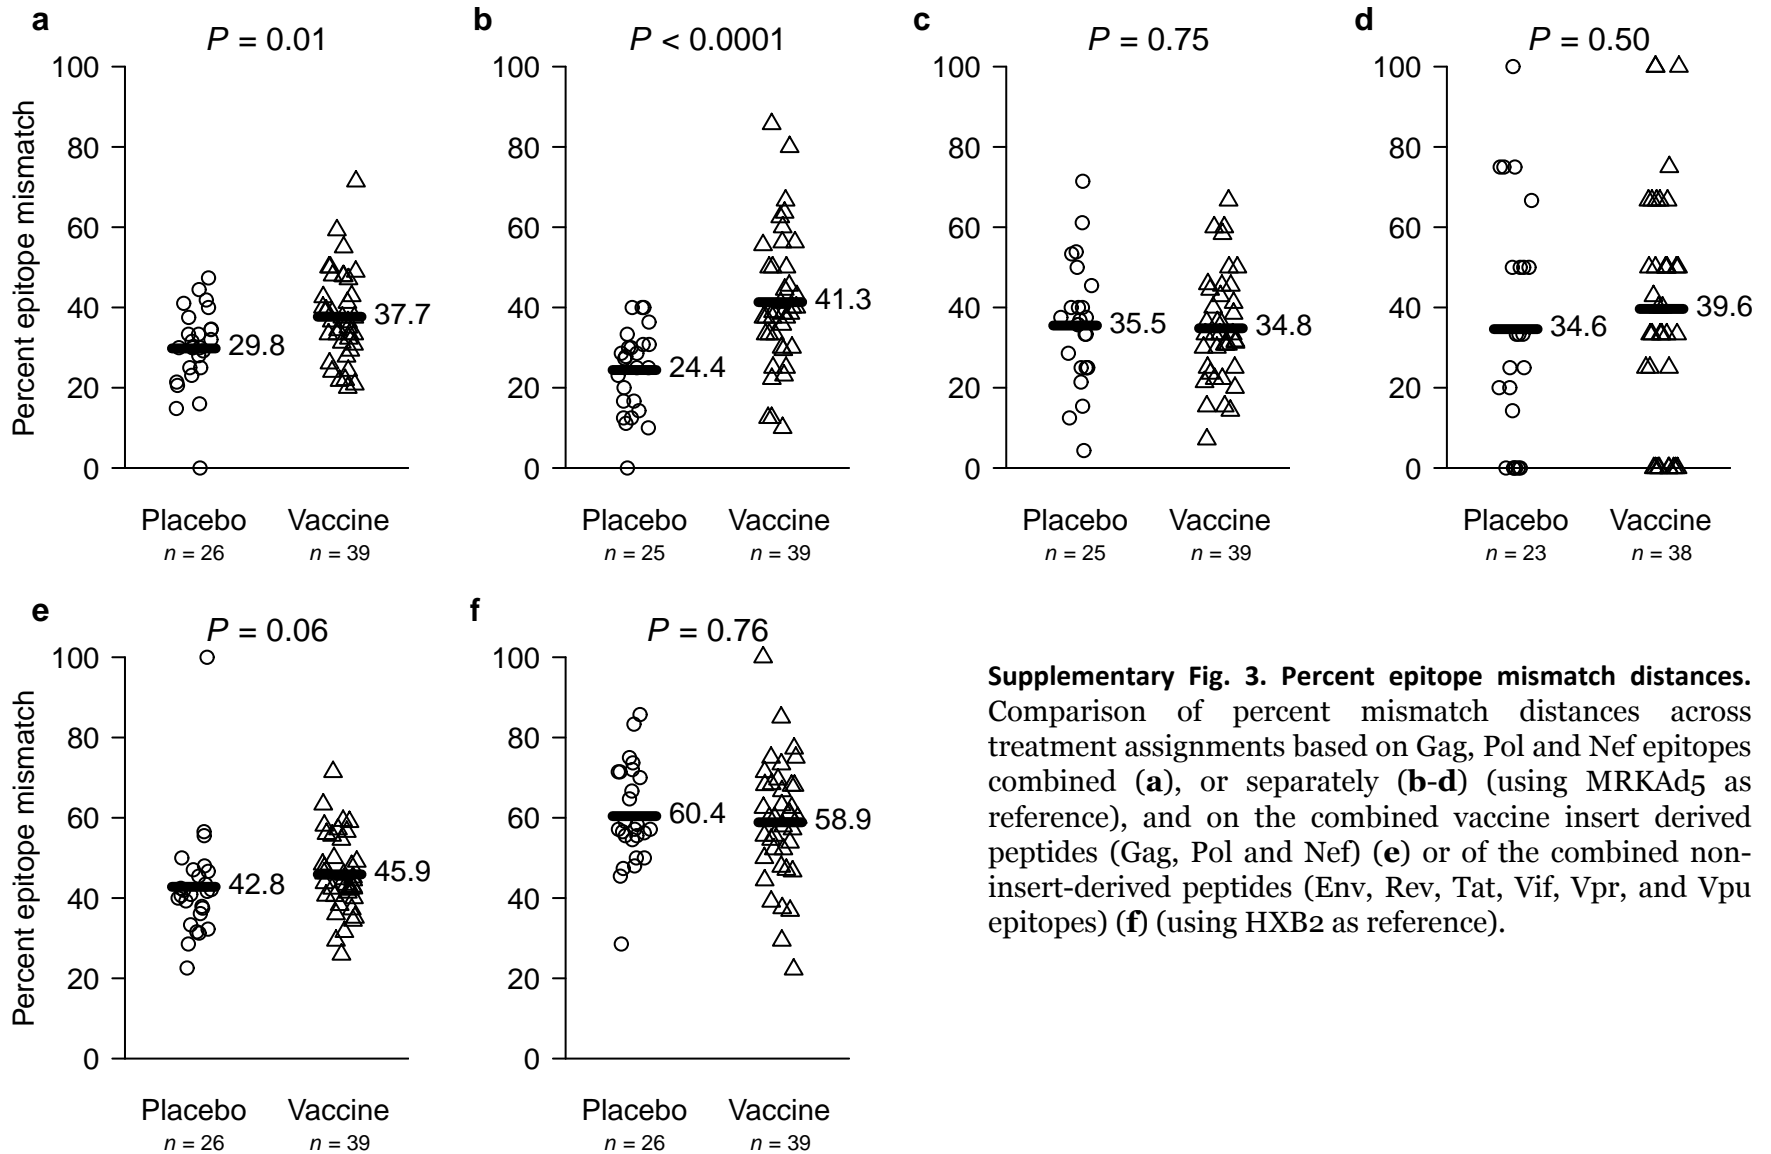

**Supplementary Fig. 3. Percent epitope mismatch distances.** Comparison of percent mismatch distances across treatment assignments based on Gag, Pol and Nef epitopes combined (**a**), or separately (**b-d**) (using MRKAd5 as reference), and on the combined vaccine insert derived peptides (Gag, Pol and Nef) (**e**) or of the combined non-insert-derived peptides (Env, Rev, Tat, Vif, Vpr, and Vpu epitopes) (**f**) (using HXB2 as reference).
