# Supplementary material
Source: PubMed Central journal article supplement (PMC3053571)
Supplement: NIHMS269267-supplement-8.pdf [file NIHMS269267-supplement-8.pdf]

Supplementary Fig. 4

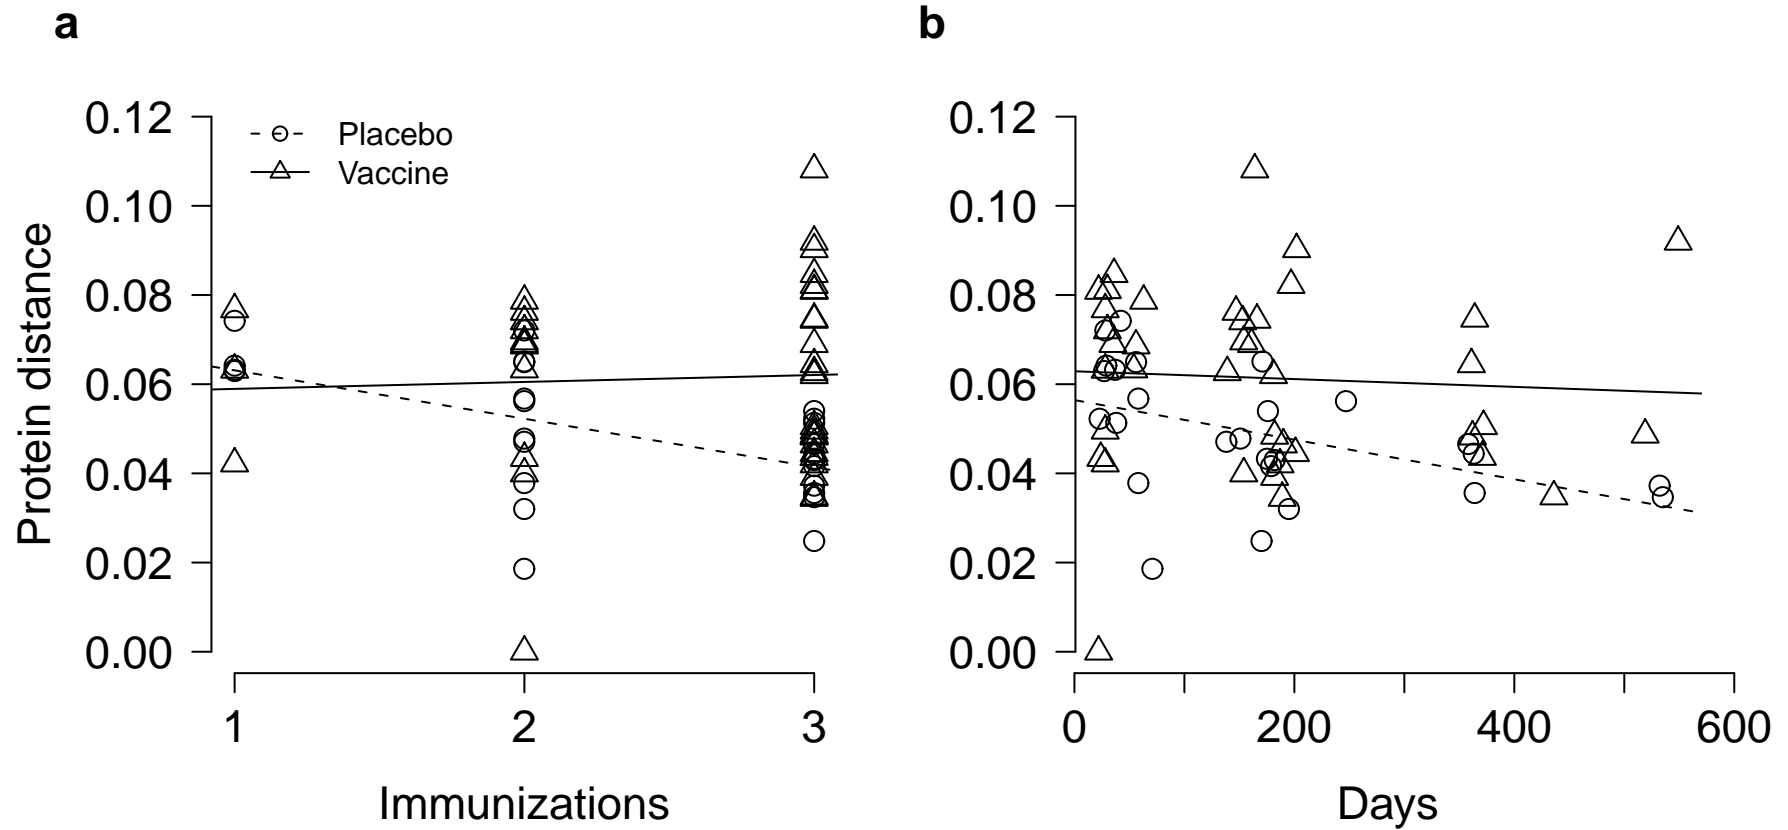

**Supplementary Fig. 4. Relationship between protein distances and the number or timing of immunization(s).** Epitopic distances (Gag, Pol, Nef combined; NetMHC derived) are plotted for vaccinees and placebos against: **(a)** the number of immunizations prior to infection, and; **(b)** the number of days between the last immunization and infection. The solid and dotted lines are regression lines through the vaccinees and placebo recipients, respectively.
